# Supplementary material for: Characteristics of unintentional childhood injury during COVID-19: a single-center comparative study
Source: PubMed Central journal article supplement — Transl Pediatr. 2023 Mar 29;12(3):405–16. doi: 10.21037/tp-23-79 (PMC10080488; doi:10.21037/tp-23-79), 2023-03-29
Supplement: tp-12-03-405-dss.pdf [file tp-12-03-405-dss.pdf]

## Data Sharing Statement

|                     |                                                                                                                                                     |                                                                                                                 |
|---------------------|-----------------------------------------------------------------------------------------------------------------------------------------------------|-----------------------------------------------------------------------------------------------------------------|
| <b>Article Info</b> | <a href="https://dx.doi.org/10.21037/tp-23-79">https://dx.doi.org/10.21037/tp-23-79</a>                                                             |                                                                                                                 |
| <b>Item</b>         | <b>Question</b>                                                                                                                                     | <b>Authors' Response<br/>(place "-" if not applicable)</b>                                                      |
| 1                   | Would you like to share data collected for your study to others?                                                                                    | No.                                                                                                             |
| 2                   | If not, would you like to share the reason for your decision?                                                                                       | This study is a retrospective study on the patient's medical record data, which involves the patient's privacy. |
| 3                   | What data in particular will be shared?                                                                                                             | -                                                                                                               |
| 4                   | Any other documents will be shared? Such as study protocol, statistical analysis plan, informed consent form, clinical study report, analytic code. | -                                                                                                               |
| 5                   | When will data availability begin?                                                                                                                  | -                                                                                                               |
| 6                   | When will data availability end?                                                                                                                    | -                                                                                                               |
| 7                   | To whom will you share the data?                                                                                                                    | -                                                                                                               |
| 8                   | For what type of analysis or purpose?                                                                                                               | -                                                                                                               |
| 9                   | How or where can the data/documents be obtained?                                                                                                    | -                                                                                                               |
| 10                  | Any other restrictions?                                                                                                                             | -                                                                                                               |
