# Supplementary material for: Characteristics of unintentional childhood injury during COVID-19: a single-center comparative study
Source: PubMed Central journal article supplement — Transl Pediatr. 2023 Mar 29;12(3):405–16. doi: 10.21037/tp-23-79 (PMC10080488; doi:10.21037/tp-23-79), 2023-03-29
Supplement: tp-12-03-405-rc.pdf [file tp-12-03-405-rc.pdf]

## STROBE Statement—checklist of items that should be included in reports of observational studies

| Section/item                 | Item No | Recommendation                                                                                                                                                                                                                                                                                                                                                                                                                                                         | Reported on Page Number/Line Number    | Reported on Section/Paragraph          |
|------------------------------|---------|------------------------------------------------------------------------------------------------------------------------------------------------------------------------------------------------------------------------------------------------------------------------------------------------------------------------------------------------------------------------------------------------------------------------------------------------------------------------|----------------------------------------|----------------------------------------|
| Title and abstract           | 1       | (a) Indicate the study's design with a commonly used term in the title or the abstract                                                                                                                                                                                                                                                                                                                                                                                 | Page 1/ Line 2-3                       | Title                                  |
|                              |         | (b) Provide in the abstract an informative and balanced summary of what was done and what was found                                                                                                                                                                                                                                                                                                                                                                    | Page 2/ Line 34-60                     | Abstract/ Paragraph 1-4                |
| <b>Introduction</b>          |         |                                                                                                                                                                                                                                                                                                                                                                                                                                                                        |                                        |                                        |
| Background/<br>rationale     | 2       | Explain the scientific background and rationale for the investigation being reported                                                                                                                                                                                                                                                                                                                                                                                   | Page 3 /Line 68-Page 4/Line 110        | Introduction/ Paragraph 1-3            |
| Objectives                   | 3       | State specific objectives, including any prespecified hypotheses                                                                                                                                                                                                                                                                                                                                                                                                       | Page 4/ Line 108-110                   | Introduction/ Paragraph 3              |
| <b>Methods</b>               |         |                                                                                                                                                                                                                                                                                                                                                                                                                                                                        |                                        |                                        |
| Study design                 | 4       | Present key elements of study design early in the paper                                                                                                                                                                                                                                                                                                                                                                                                                | Page 4/ Line 114-Page 5/ Line 127      | Methods/ Paragraph 1-2                 |
| Setting                      | 5       | Describe the setting, locations, and relevant dates, including periods of recruitment, exposure, follow-up, and data collection                                                                                                                                                                                                                                                                                                                                        | Page 4/ Line 114-Page 5/ Line 138      | Methods/ Paragraph 1-3                 |
| Participants                 | 6       | (a) <b>Cohort study</b> —Give the eligibility criteria, and the sources and methods of selection of participants. Describe methods of follow-up<br><b>Case-control study</b> —Give the eligibility criteria, and the sources and methods of case ascertainment and control selection. Give the rationale for the choice of cases and controls<br><b>Cross-sectional study</b> —Give the eligibility criteria, and the sources and methods of selection of participants | Page 4/ Line 114-Page 5/ Line 127      | Methods/ Paragraph 1-2                 |
|                              |         | (b) <b>Cohort study</b> —For matched studies, give matching criteria and number of exposed and unexposed<br><b>Case-control study</b> —For matched studies, give matching criteria and the number of controls per case                                                                                                                                                                                                                                                 | N/A, the study is not a matched study. | N/A, the study is not a matched study. |
| Variables                    | 7       | Clearly define all outcomes, exposures, predictors, potential confounders, and effect modifiers. Give diagnostic criteria, if applicable                                                                                                                                                                                                                                                                                                                               | Page 5 /Line 139-151                   | Methods/ Paragraph 4-5                 |
| Data sources/<br>measurement | 8*      | For each variable of interest, give sources of data and details of methods of assessment (measurement). Describe comparability of assessment methods if there is more than one group                                                                                                                                                                                                                                                                                   | Page 5 /Line 139-151                   | Methods/ Paragraph 4-5                 |

|                        |     |                                                                                                                                                                                                                                                                                                           |                                                           |                                                           |
|------------------------|-----|-----------------------------------------------------------------------------------------------------------------------------------------------------------------------------------------------------------------------------------------------------------------------------------------------------------|-----------------------------------------------------------|-----------------------------------------------------------|
| Bias                   | 9   | Describe any efforts to address potential sources of bias                                                                                                                                                                                                                                                 | Page 5 /Line 131-134<br>Page 5 /Line 143-145              | Methods/ Paragraph 3-4                                    |
| Study size             | 10  | Explain how the study size was arrived at                                                                                                                                                                                                                                                                 | Page 6 /Line 169-176                                      | Results/ Paragraph 1                                      |
| Quantitative variables | 11  | Explain how quantitative variables were handled in the analyses. If applicable, describe which groupings were chosen and why                                                                                                                                                                              | Page 5 /Line 139-151                                      | Methods/ Paragraph 4-5                                    |
| Statistical methods    | 12  | (a) Describe all statistical methods, including those used to control for confounding                                                                                                                                                                                                                     | Page 6 /Line 158-164                                      | Methods/ Paragraph 7                                      |
|                        |     | (b) Describe any methods used to examine subgroups and interactions                                                                                                                                                                                                                                       | N/A, subgroup analysis was not conducted in the study.    | N/A, subgroup analysis was not conducted in the study.    |
|                        |     | (c) Explain how missing data were addressed                                                                                                                                                                                                                                                               | Page 6 /Line 164                                          | Methods/ Paragraph 7                                      |
|                        |     | (d) <b>Cohort study</b> —If applicable, explain how loss to follow-up was addressed<br><b>Case-control study</b> —If applicable, explain how matching of cases and controls was addressed<br><b>Cross-sectional study</b> —If applicable, describe analytical methods taking account of sampling strategy | Page 6 /Line 164                                          | Methods/ Paragraph 7                                      |
|                        |     | (e) Describe any sensitivity analyses                                                                                                                                                                                                                                                                     | N/A, sensitivity analysis was not conducted in the study. | N/A, sensitivity analysis was not conducted in the study. |
| <b>Results</b>         |     |                                                                                                                                                                                                                                                                                                           |                                                           |                                                           |
| Participants           | 13* | (a) Report numbers of individuals at each stage of study—eg numbers potentially eligible, examined for eligibility, confirmed eligible, included in the study, completing follow-up, and analysed                                                                                                         | Page 6 /Line 169-176                                      | Results/ Paragraph 1                                      |
|                        |     | (b) Give reasons for non-participation at each stage                                                                                                                                                                                                                                                      | Page 5 /Line 124-127<br>Page 6 /Line 169-176              | Methods/ Paragraph 2<br>Results/ Paragraph 1              |
|                        |     | (c) Consider use of a flow diagram                                                                                                                                                                                                                                                                        | Page 21 /Line 521                                         | Figure 1                                                  |
| Descriptive data       | 14* | (a) Give characteristics of study participants (eg demographic, clinical, social) and information on exposures and potential confounders                                                                                                                                                                  | Page 6/Line 181-<br>Page 7/Line 120                       | Results/ Paragraph 2-3                                    |

|                          |     |                                                                                                                                                                                                              |                                            |                                            |
|--------------------------|-----|--------------------------------------------------------------------------------------------------------------------------------------------------------------------------------------------------------------|--------------------------------------------|--------------------------------------------|
|                          |     | (b) Indicate number of participants with missing data for each variable of interest                                                                                                                          | Page 6 /Line 174                           | Results/ Paragraph 1                       |
|                          |     | (c) <b>Cohort study</b> —Summarise follow-up time (eg, average and total amount)                                                                                                                             | N/A, the study did not follow up patients. | N/A, the study did not follow up patients. |
| Outcome data             | 15* | <b>Cohort study</b> —Report numbers of outcome events or summary measures over time                                                                                                                          | Page 17/Line 509-<br>Page 20/Line 520      | Table 2-5                                  |
|                          |     | <b>Case-control study</b> —Report numbers in each exposure category, or summary measures of exposure                                                                                                         | N/A, not Case-control study                | N/A, not Case-control study                |
|                          |     | <b>Cross-sectional study</b> —Report numbers of outcome events or summary measures                                                                                                                           | N/A, not Cross-sectional study             | N/A, not Cross-sectional study             |
| Main results             | 16  | (a) Give unadjusted estimates and, if applicable, confounder-adjusted estimates and their precision (eg, 95% confidence interval). Make clear which confounders were adjusted for and why they were included | Page 7/Line 201-<br>Page 8 /Line 238       | Results/Paragraph 4-8                      |
|                          |     | (b) Report category boundaries when continuous variables were categorized                                                                                                                                    | Page 5/Line 148-151                        | Methods/ Paragraph 5                       |
|                          |     | (c) If relevant, consider translating estimates of relative risk into absolute risk for a meaningful time period                                                                                             | N/A, irrelevant                            | N/A, irrelevant                            |
| Other analyses           | 17  | Report other analyses done—eg analyses of subgroups and interactions, and sensitivity analyses                                                                                                               | N/A, No other analysis                     | N/A, No other analysis                     |
| <b>Discussion</b>        |     |                                                                                                                                                                                                              |                                            |                                            |
| Key results              | 18  | Summarise key results with reference to study objectives                                                                                                                                                     | Page 12/ Line 379-<br>390                  | Conclusion/ Paragraph 1                    |
| Limitations              | 19  | Discuss limitations of the study, taking into account sources of potential bias or imprecision. Discuss both direction and magnitude of any potential bias                                                   | Page 12/ Line 367-<br>375                  | Discussion/ Paragraph 8                    |
| Interpretation           | 20  | Give a cautious overall interpretation of results considering objectives, limitations, multiplicity of analyses, results from similar studies, and other relevant evidence                                   | Page 8/ Line 241-<br>Page 12/Line 366      | Discussion/ Paragraph 1-<br>7              |
| Generalisability         | 21  | Discuss the generalisability (external validity) of the study results                                                                                                                                        | Page 12/ Line 368-<br>370                  | Conclusion/ Paragraph 2                    |
| <b>Other information</b> |     |                                                                                                                                                                                                              |                                            |                                            |
| Funding                  | 22  | Give the source of funding and the role of the funders for the present study and, if applicable, for the original study on which the present article is based                                                | Page 13/ Line 394                          | Acknowledgments/<br>Paragraph 1            |

\*Give information separately for cases and controls in case-control studies and, if applicable, for exposed and unexposed groups in cohort and cross-sectional studies.

**Note:** An Explanation and Elaboration article discusses each checklist item and gives methodological background and published examples of transparent reporting. The STROBE checklist is best used in conjunction with this article (freely available on the Web sites of PLoS Medicine at <http://www.plosmedicine.org/>, Annals of Internal Medicine at <http://www.annals.org/>, and Epidemiology at <http://www.epidem.com/>). Information on the STROBE Initiative is available at [www.strobe-statement.org](http://www.strobe-statement.org).

Article information: <https://dx.doi.org/10.21037/tp-23-79>

\*As the checklist was provided upon initial submission, the page number/line number reported may be changed due to copyediting and may not be referable in the published version. In this case, the section/paragraph may be used as an alternative reference.

Updated on April 13, 2020
